# Supplementary material for: Associates of Insomnia in People with Chronic Spinal Pain: A Systematic Review and Meta-Analysis
Source: MDPI journal article supplement (doi:10.3390/jcm10143175), 2021-07-19
Supplement: s1 [file s1]

**Supplementary file S2** Newcastle – Ottawa scale adapted for cross-sectional studies, based on the version of Modesti et al. 2016 [23]

*Selection*

- 1) Representativeness of the sample:
  - a) Truly representative of the average in the target population. \* (all subjects or random sampling)
  - b) Somewhat representative of the average in the target population. \* (non-random sampling)
  - c) Selected group of users.
  - d) No description of the sampling strategy.
- 2) Sample size:
  - a) Justified and satisfactory. \*
  - b) Not justified.
- 3) Non-respondents:
  - a) Comparability between respondents and non-respondents characteristics is established, and the response rate is satisfactory. \*
  - b) The response rate is unsatisfactory, or the comparability between respondents and non-respondents is unsatisfactory.
  - c) No description of the response rate or the characteristics of the responders and the non-responders.
- 4) Ascertainment of the exposure (risk factor):
  - a) Validated measurement tool. \*\*
  - b) Non-validated measurement tool, but the tool is available or described.\*
  - c) No description of the measurement tool.

*Comparability: (Maximum 2 stars)*

- 1) The subjects in different outcome groups are comparable, based on the study design or analysis. Confounding factors are controlled.
  - a) The study controls for sex or age. \*
  - b) The study control for any additional factor. \*

*Outcome: (Maximum 3 stars)*

- 1) Assessment of the outcome:
  - a) Independent blind assessment. \*\*
  - b) Record linkage. \*\*
  - c) Self-report. \*
  - d) No description.
- 2) Statistical test:
  - a) The statistical test used to analyze the data is clearly described and appropriate, and the measurement of the association is presented, including confidence intervals and the probability level (p value). \*
  - b) The statistical test is not appropriate, not described or incomplete.

Strict scoring criteria were determined a priori based on findings in literature. The response-rate was considered "satisfactory" when it reached  $\geq 80\%$ [25]. The sample size was considered "justified and satisfactory" if the number of needed participants was reached based on a sample size calculation, or when the study is a national or epidemiological study. For the section "comparability", two points were possibly awarded: one for controlling for age or sex, and one for controlling for any other factor. Since age- and sex differences in sleep are common[26-29], both factors were considered to be the most important factors to be controlled for. When an item was not described, a score of zero was given for that particular item.
