# Supplementary material for: Associates of Insomnia in People with Chronic Spinal Pain: A Systematic Review and Meta-Analysis
Source: MDPI journal article supplement (doi:10.3390/jcm10143175), 2021-07-19
Supplement: s1 [file s1]

**Table S1 Search Terms**

|                   | <b>P</b><br><b>Spinal Pain</b>                                                                                                                                                                                                                                                                                                      | <b>E</b><br><b>Insomnia</b>                                                                                                                                                                                                                                                                                                                                                                                                                                                                                                                                                                                                                                                        | <b>O</b><br><b>Determinants</b>                                                                                                                                                                                                                                                                         |
|-------------------|-------------------------------------------------------------------------------------------------------------------------------------------------------------------------------------------------------------------------------------------------------------------------------------------------------------------------------------|------------------------------------------------------------------------------------------------------------------------------------------------------------------------------------------------------------------------------------------------------------------------------------------------------------------------------------------------------------------------------------------------------------------------------------------------------------------------------------------------------------------------------------------------------------------------------------------------------------------------------------------------------------------------------------|---------------------------------------------------------------------------------------------------------------------------------------------------------------------------------------------------------------------------------------------------------------------------------------------------------|
| <i>MeSH terms</i> | Back Pain<br>Neck Pain                                                                                                                                                                                                                                                                                                              | Sleep<br>Sleep Wake Disorders                                                                                                                                                                                                                                                                                                                                                                                                                                                                                                                                                                                                                                                      | Epidemiology<br>Epidemiologic Factors<br>Prognosis<br>Etiology [subheading]                                                                                                                                                                                                                             |
| <i>Free terms</i> | Back pain*<br>neck pain*<br>spine pain*<br>spinal pain*<br>Vertebrogenic pain*<br>lumbar pain*<br>cervical pain*<br>Discogenic pain*<br>facet pain*<br>facet joint pain*<br>zygapophyseal pain*<br>zygapophyseal joint pain*<br>Backache*<br>discopathy<br>lumbago<br>whiplash<br>trapezius myalgia<br>dorsalgi*<br>vertebral pain* | sleep problem*<br>sleeping problem*<br>sleep disorder*<br>sleeping disorder*<br>sleeping difficult*<br>sleep difficult*<br>sleep disturb*<br>sleeping disturb*<br>sleep pattern*<br>sleeping pattern*<br>sleepless*<br>wakeful*<br>sleep dysfunction*<br>sleeping dysfunction*<br>Non-restorative sleep*<br>unrefreshing sleep*<br>Insufficient sleep*<br>short sleep*<br>sleep disease*<br>sleeping sickness*<br>sleep sickness*<br>insomnia*<br>"sleep quality"<br>"sleep onset"<br>sleep efficien*<br>sleep fragment*<br>sleep latency<br>polysomnography<br>sleep diar*<br>actigraph*<br>sleeping disease*<br>"sleep continuity"<br>dyssomni*<br>sleep deprivat*<br>hyposomni* | Risks<br>etiology<br>causalit*<br>variable*<br>indicator*<br>incidence<br>frequenc*<br>causation*<br>prognos*<br>outcome*<br>factor*<br>predict*<br>probabilit*<br>prevalence*<br>hazard ratio*<br>odds ratio*<br>determinant*<br>contribut*<br>characteristic*<br>predispos*<br>epidemiology<br>cause* |
