# Supplementary material for: Associates of Insomnia in People with Chronic Spinal Pain: A Systematic Review and Meta-Analysis
Source: MDPI journal article supplement (doi:10.3390/jcm10143175), 2021-07-19
Supplement: s1 [file s1]

**Table S3.** *Quality of Evidence - Modified version of the Grading of Recommendations Assessment, Development, and Evaluation criteria*

| Quality assessment                    |                                     |                                |                            |                           |                          |                               |                          |                            |          |
|---------------------------------------|-------------------------------------|--------------------------------|----------------------------|---------------------------|--------------------------|-------------------------------|--------------------------|----------------------------|----------|
| Factor meta-analysis                  | Downgraded                          |                                |                            |                           |                          |                               | Upgraded                 |                            | Overall  |
|                                       | Phase of investigation <sup>1</sup> | Study limitations <sup>2</sup> | Inconsistency <sup>3</sup> | Indirectness <sup>4</sup> | Imprecision <sup>5</sup> | Publication bias <sup>6</sup> | Effect size <sup>7</sup> | Exposure-response gradient |          |
| Sex                                   | ↓                                   |                                |                            |                           |                          | ↓#                            |                          |                            | Low      |
| Age                                   | ↓                                   |                                |                            |                           |                          | ↓#                            |                          |                            | Low      |
| Body mass index                       | ↓                                   |                                |                            |                           |                          | ↓#                            |                          |                            | Low      |
| Physical activity                     | ↓                                   |                                | ↓                          | ↓                         |                          | ↓#                            |                          |                            | Very Low |
| Subgroup analysis – physical activity | ↓                                   |                                |                            |                           |                          | ↓#                            |                          |                            | Low      |
| Professional activity                 | ↓                                   |                                |                            |                           |                          | ↓#                            |                          |                            | Low      |
| Comorbidities                         | ↓                                   |                                | ↓                          |                           |                          | ↓#                            |                          |                            | Very Low |
| Pain intensity                        | ↓                                   |                                |                            |                           |                          | ↓#                            | ↑                        |                            | Moderate |
| Depression                            | ↓                                   |                                |                            |                           |                          | ↓#                            | ↑                        |                            | Moderate |
| Anxiety                               | ↓                                   |                                |                            |                           |                          | ↓#                            | ↑                        |                            | Moderate |

<sup>1</sup> Cross-sectional studies

<sup>2</sup> > 25% of the participants from studies with high risk of bias

<sup>3</sup> Heterogeneity was based on similarity of point estimates, extent of overlap of confidence intervals, and I<sup>2</sup> test (> 50%).

<sup>4</sup> Indirectness: > 25% of results from that failure to apply appropriate eligibility criteria and had poor measurement of both exposure and outcome.

<sup>5</sup> Fewer than 400 participants in the pooling

<sup>6</sup> Funnel plot and Egger's test

<sup>7</sup> Odds ratio > 2.5

↑ Upgraded

↓ Downgraded

# Unclear: Unable to assess publication bias (< 10 studies)
