# Supplementary material for: Associates of Insomnia in People with Chronic Spinal Pain: A Systematic Review and Meta-Analysis
Source: J Clin Med. 2021 Jul 19;10(14):3175. doi: 10.3390/jcm10143175 (PMC8304652; doi:10.3390/jcm10143175)
Supplement: Supplementary file 1 [file jcm-10-03175-s001.zip]

Archive with 5 entries (5 files):
- Supplementary file S1 Searches databases.pdf
- Supplementary file S2.pdf
- Table S1.pdf
- Table S2.pdf
- Table S3 Quality of Evidence.pdf
